# Supplementary material for: Hepatocellular carcinoma risk-stratification based on ASGR1 in circulating epithelial cells for cancer interception
Source: PubMed Central journal article supplement (PMC9742249; doi:10.3389/fmolb.2022.1074277), 2022-11-28
Supplement: Image2.pdf [file Image2.pdf]

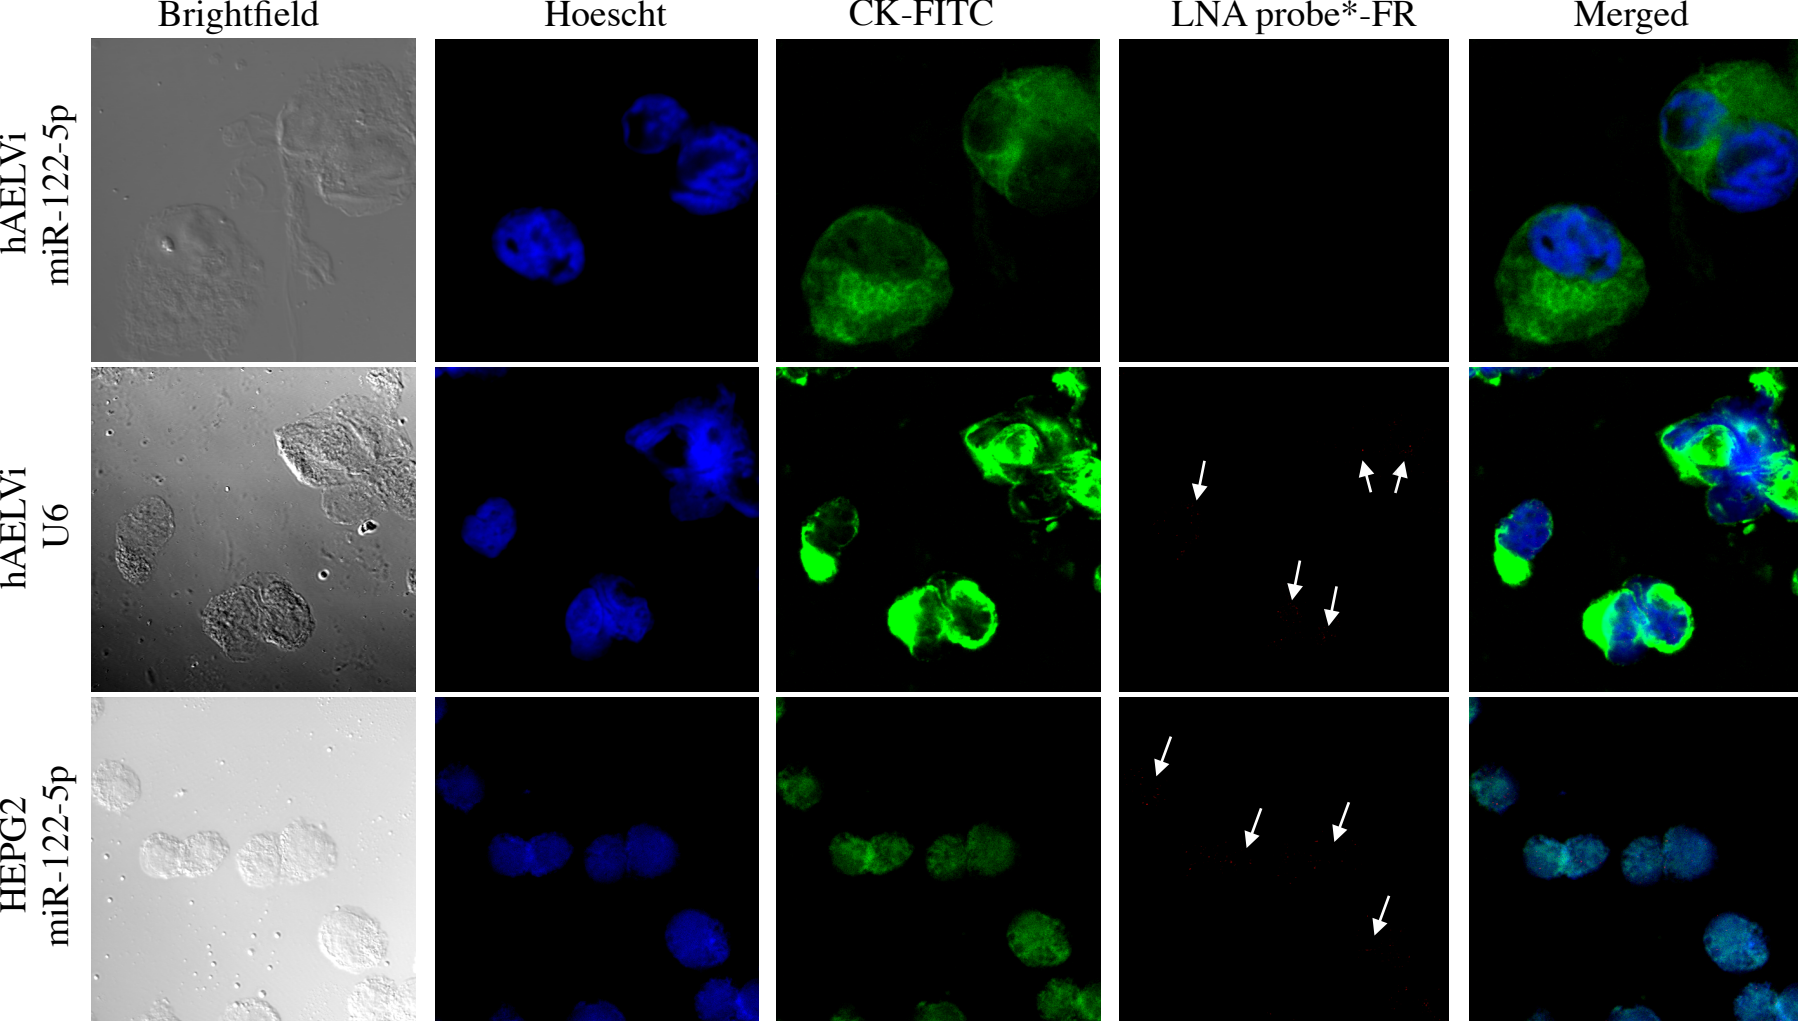

**Supplementary figure 2: ImmunofISH control experiments using LNA probes.**

The alveolar epithelial cells hAELVi were used as negative control for LNA-miR-122-5p and as positive for the control LNA-U6 probes visualized using fast red (FR). Cytokeratin (CK) was stained with FITC (green). The hepatocellular carcinoma cell line (HEPG2) shows positive staining of both markers, CK and miR-122-5p whereas hAELVi shows negative staining for miR-122-5p. Hoescht was used as nuclear staining. \*LNA probes are shown in the y-axis of the figure as they are different for each experiment.
